# Supplementary material for: Life Years at Risk: A Population Health Measure from a Prevention Perspective
Source: MDPI journal article supplement (doi:10.3390/ijerph6092387), 2009-09-03
Supplement: s1 [file s1]

*Correction*

## **Editor's Note – Received Date Error, *Int. J. Environ. Res. Public Health* **2009**, *6*, 2387-2396**

**Gardenia You**

MDPI Beijing Office, Floor 4, Chelifen Village Committee Office Building, Liyuan Town, Tongzhou District, 101101 Beijing, China; E-Mail: gardenia.you@em.mdpi.org; Tel.: +86 10 605 288 33; Fax: +86 10 605 247 74

*Published: 3 November 2009*

---

*Editor's Note* added on 3 November 2009: The received date was wrong in *Int. J. Environ. Res. Public Health* **2009**, *6*, 2387-2396. It should be 29 July 2009 instead of 29 July 2008.

### **References**

1. Zhao, Y.; Malyon, R. Life Years at Risk: A Population Health Measure from a Prevention Perspective. *Int. J. Environ. Res. Public Health* **2009**, *6*, 2387-2396.

© 2009 by the authors; licensee Molecular Diversity Preservation International, Basel, Switzerland. This article is an open-access article distributed under the terms and conditions of the Creative Commons Attribution license (<http://creativecommons.org/licenses/by/3.0/>).
